# Supplementary material for: Chlorpyrifos Suppresses Neutrophil Extracellular Traps in Carp by Promoting Necroptosis and Inhibiting Respiratory Burst Caused by the PKC/MAPK Pathway
Source: Hindawi journal article supplement (doi:10.1155/2019/1763589), 2019-02-07
Supplement: f1 [file 1763589.f1.pdf]

## Supplementary materials

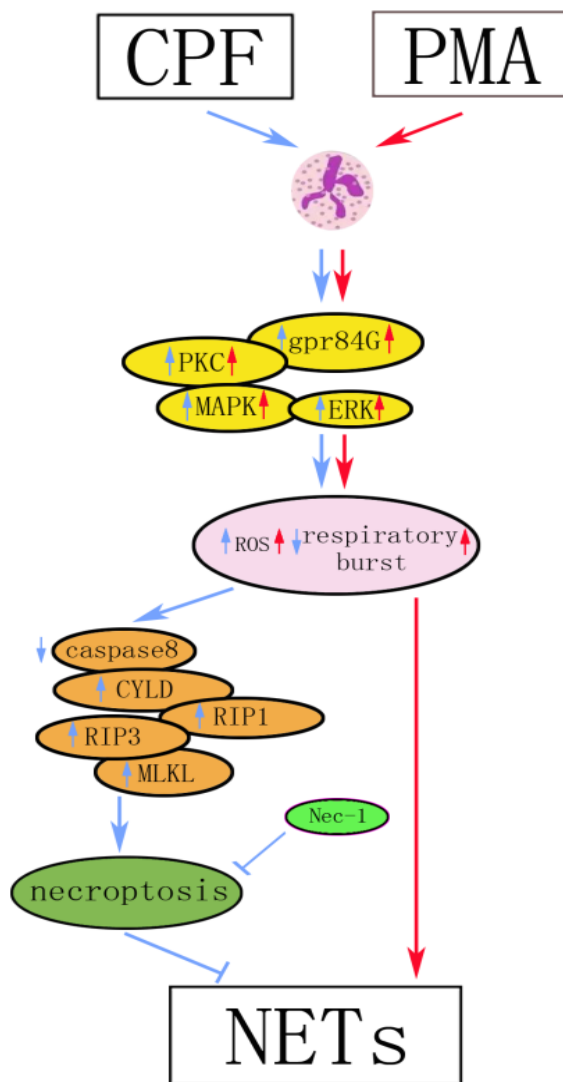

Figure S1 Graphical abstract

CPF reduces PMA-induced NETs formation by activating necroptosis and Nec-1 can reduce the inhibition. At the same time, CPF inhibits respiratory burst induced by PMA through the PKC-MAPK pathway to inhibit NETs production.
